# Supplementary material for: Untargeted Metabolomics and Antioxidant Capacities of Muscadine Grape Genotypes during Berry Development
Source: MDPI journal article supplement (doi:10.3390/antiox10060914), 2021-06-04
Supplement: s1 [file s1]

**Table S1.** Identified metabolites in muscadine grape genotypes at selected developmental stages.

| No. | Compounds identified in ESI+ mode | Compounds identified in ESI- mode    | Compounds identified in both ESI+ and ESI- mode | Fruit-Set (FS) | Veraison (V) | Ripening- Skin/Flesh (RIP-SF) | Ripening- Seeds (RIP-S) |
|-----|-----------------------------------|--------------------------------------|-------------------------------------------------|----------------|--------------|-------------------------------|-------------------------|
| 1   | Piperidine                        | Methyl acetate                       | Acrylic acid                                    | Y              | Y            | Y                             | Y                       |
| 2   | Isobutyric acid                   | Oxalic acid                          | Isocrotonic acid                                | Y              | Y            | Y                             | Y                       |
| 3   | Alanine                           | Malonic acid                         | Phosphate                                       | Y              | Y            | Y                             | Y                       |
| 4   | Phenol                            | Glyceric acid                        | Serine                                          | Y              | Y            | Y                             | Y                       |
| 5   | 5-Aminolevulinic acid             | Phenylacetaldehyde                   | Pyrocatechol                                    | Y              | Y            | Y                             | Y                       |
| 6   | Amidosulfonic acid                | Oxalacetic acid                      | 2-Furoic acid                                   | Y              | Y            | Y                             | Y                       |
| 7   | 2-Furanmethanol                   | Methylsuccinic acid                  | Fumaric acid                                    | Y              | Y            | Y                             | Y                       |
| 8   | Cyclohexylamine                   | Ureidopropionic acid                 | Succinic acid                                   | Y              | Y            | Y                             | Y                       |
| 9   | Tiglic acid                       | Deoxyribose                          | L-Threonine                                     | Y              | Y            | Y                             | Y                       |
| 10  | Triethylamine                     | Threonic acid                        | Cysteine                                        | Y              | Y            | Y                             | Y                       |
| 11  | Aminobutyric acid                 | Citramalic acid                      | 4-Hydroxybenzaldehyde                           | Y              | Y            | Y                             | Y                       |
| 12  | Styrene                           | Tartaric acid                        | Pyroglutamic acid                               | Y              | Y            | Y                             | Y                       |
| 13  | Benzaldehyde                      | p-Hydroxyphenylacetic acid           | Itaconic acid                                   | Y              | Y            | Y                             | Y                       |
| 14  | Quinone                           | Gentisic acid                        | L-Leucine                                       | Y              | Y            | Y                             | Y                       |
| 15  | p-Cresol                          | Pimelic acid                         | Ornithine                                       | Y              | Y            | Y                             | Y                       |
| 16  | Histamine                         | 7-Methylxanthine                     | L-Aspartic acid                                 | Y              | Y            | Y                             | Y                       |
| 17  | Epsilon-caprolactam               | 5-Methoxysalicylic acid              | Malic acid                                      | Y              | Y            | Y                             | Y                       |
| 18  | Dihydrouracil                     | Suberic acid                         | 2-Methylbenzoic acid                            | Y              | Y            | Y                             | Y                       |
| 19  | Heptanal                          | Ascorbic acid                        | Salicylic acid                                  | Y              | Y            | Y                             | Y                       |
| 20  | Proline                           | Azelaic acid                         | 4-Acetamidobutanoic acid                        | Y              | Y            | Y                             | Y                       |
| 21  | Levulinic acid                    | D-Glucuronic acid                    | Oxoglutaric acid                                | Y              | Y            | Y                             | Y                       |
| 22  | Indole                            | Gluconic acid                        | Adipic acid                                     | Y              | Y            | Y                             | Y                       |
| 23  | Valine                            | Galactaric acid                      | Glutamine                                       | Y              | Y            | Y                             | Y                       |
| 24  | Ethyl lactate                     | Jasmonic acid                        | L-Glutamic acid                                 | Y              | Y            | Y                             | Y                       |
| 25  | Erythrose                         | Undecanedioic acid                   | Cinnamic acid                                   | Y              | Y            | Y                             | Y                       |
| 26  | Acetophenone                      | Liqcoumarin                          | Mevalonic acid                                  | Y              | Y            | Y                             | Y                       |
| 27  | Phenylethylamine                  | L-Cystine                            | L-Histidine                                     | Y              | Y            | Y                             | Y                       |
| 28  | Niacinamide                       | Vanillic acid 4-O-sulfate            | Oxoapipic acid                                  | Y              | Y            | Y                             | Y                       |
| 29  | Nicotinic acid                    | Diflunisal                           | L-Phenylalanine                                 | Y              | Y            | Y                             | Y                       |
| 30  | Guaiacol                          | Citrinin                             | Phthalic acid                                   | Y              | Y            | Y                             | Y                       |
| 31  | Taurine                           | beta-D-Glucose 6-phosphate           | Phosphoenolpyruvic acid                         | Y              | Y            | Y                             | Y                       |
| 32  | Thymine                           | Neuraminic acid                      | Gallic acid                                     | Y              | Y            | Y                             | Y                       |
| 33  | 5-Hydroxy-2-furoic acid           | 3-Oxohexadecanoic acid               | Aconitic acid                                   | Y              | Y            | Y                             | Y                       |
| 34  | Furaneol                          | 16-Hydroxyhexadecanoic acid          | Shikimic acid                                   | Y              | Y            | Y                             | Y                       |
| 35  | Dihydrothymine                    | Stearic acid                         | L-Arginine                                      | Y              | Y            | Y                             | Y                       |
| 36  | Pipecolic acid                    | Luteolin                             | Caffeic acid                                    | Y              | Y            | Y                             | Y                       |
| 37  | 2,4,6-Octatriynoic acid           | Retinoic acid                        | Galactose                                       | Y              | Y            | Y                             | Y                       |
| 38  | Glutaric acid                     | N-Undecylbenzenesulfonic acid        | L-Tyrosine                                      | Y              | Y            | Y                             | Y                       |
| 39  | Asparagine                        | 6-Chlorocatechin                     | 4-Pyridoxic acid                                | Y              | Y            | Y                             | Y                       |
| 40  | p-Cymene                          | Cibacic acid                         | N-Acetyl-L-glutamic acid                        | Y              | Y            | Y                             | Y                       |
| 41  | Urocanic acid                     | Aesculin                             | Citric acid                                     | Y              | Y            | Y                             | Y                       |
| 42  | Tyrosol                           | Aucubin                              | Scopoletin                                      | Y              | Y            | Y                             | Y                       |
| 43  | Kojic acid                        | Cyclodopa glucoside                  | Quinic acid                                     | Y              | Y            | Y                             | Y                       |
| 44  | Indole-3-carboxaldehyde           | Xanthylic acid                       | Ferulic acid                                    | Y              | Y            | Y                             | Y                       |
| 45  | 4-Guanidinobutanoic acid          | 6-Epi-7-isocucurbitic acid glucoside | L-Quebrachitol                                  | Y              | Y            | Y                             | Y                       |
| 46  | Spermidine                        | S-Lactylglutathione                  | Syringic acid                                   | Y              | Y            | Y                             | Y                       |
| 47  | Coumarin                          | Piceid                               | Tryptophan                                      | Y              | Y            | Y                             | Y                       |
| 48  | Lysine                            | Caryoptosidic acid                   | 12-Hydroxydodecanoic acid                       | Y              | Y            | Y                             | Y                       |
| 49  | L-Methionine                      | Sucralose                            | Pantothenic acid                                | Y              | Y            | Y                             | Y                       |
| 50  | Phenylglyoxylic acid              | Uridine 5'-diphosphate               | Monobutylphthalate                              | Y              | Y            | Y                             | Y                       |
| 51  | Carvone                           | Epiazelechin 3-gallate               | Sinapic acid                                    | Y              | Y            | Y                             | Y                       |
| 52  | Guanine                           | Lucuminic acid                       | Traumatic acid                                  | Y              | Y            | Y                             | Y                       |
| 53  | Vanillin                          | Epigallocatechin gallate             | N-Undecanoylglycine                             | Y              | Y            | Y                             | Y                       |
| 54  | Citral                            | Isolimonic acid                      | Uridine                                         | Y              | Y            | Y                             | Y                       |
| 55  | protocatechuic acid               | Eujambolin                           | Linamarin                                       | Y              | Y            | Y                             | Y                       |
| 56  | Arecoline                         | Kaempferol 3-xylosylglucoside        | Deoxyinosine                                    | Y              | Y            | Y                             | Y                       |
| 57  | Phosphoglycolic acid              | Naringin                             | Piscidic acid                                   | Y              | Y            | Y                             | Y                       |

|     |                            |                                       |                                        |   |   |   |   |
|-----|----------------------------|---------------------------------------|----------------------------------------|---|---|---|---|
| 58  | 2,5-Furandicarboxylic acid | Isowertin 2''-rhamnoside              | Phaseolic acid                         | Y | Y | Y | Y |
| 59  | 4-Hydroxynonenal           | 3,5-Digalloylepicatechin              | Abscisic acid                          | Y | Y | Y | Y |
| 60  | Succinylacetone            | Kaempferol 7-(6''-galloylglucoside)   | Naringenin                             | Y | Y | Y | Y |
| 61  | N-Acetylvaline             | Epigallocatechin 3,5-di-gallate       | Arbutin                                | Y | Y | Y | Y |
| 62  | 3 Hydroxycoumarin          | Hesperidin                            | Phloretin                              | Y | Y | Y | Y |
| 63  | Methyl cinnamate           | Delphinidin 3-sophorose               | Punicic acid                           | Y | Y | Y | Y |
| 64  | Homomethionine             | Rhamnazin 3-rutinoside                | Linoleic acid                          | Y | Y | Y | Y |
| 65  | p-Coumaric acid            | Troloxerutin                          | Guanosine                              | Y | Y | Y | Y |
| 66  | Methionine sulfoxide       | Delphinidin 3-lathyroside 5-glucoside | Catechin                               | Y | Y | Y | Y |
| 67  | Rhamnitol                  | Acrylic acid                          | Tocopheronic acid                      | Y | Y | Y | Y |
| 68  | Quinolinic acid            | Pyruvic acid                          | Myrsinone                              | Y | Y | Y | Y |
| 69  | Pyridoxal                  | Hydroxypropionic acid                 | Caffeoylmalic acid                     | Y | Y | Y | Y |
| 70  | Isovanillic acid           | 2-Ketobutyric acid                    | Ellagic acid                           | Y | Y | Y | Y |
| 71  | Glycerol 3-phosphate       | -                                     | Quercetin                              | Y | Y | Y | Y |
| 72  | 9-Oxo-nonanoic acid        | -                                     | Epigallocatechin                       | Y | Y | Y | Y |
| 73  | Acetylornithine            | -                                     | Glutathione                            | Y | Y | Y | Y |
| 74  | Cyclamic acid              | -                                     | Myricetin                              | Y | Y | Y | Y |
| 75  | Glucosamine                | -                                     | Lepidimoic acid                        | Y | Y | Y | Y |
| 76  | Benzophenone               | -                                     | Fertaric acid                          | Y | Y | Y | Y |
| 77  | Phosphohydroxypyruvic acid | -                                     | 4-Dodecylbenzenesulfonic Acid          | Y | Y | Y | Y |
| 78  | 3,4-Dihydroxymandelic acid | -                                     | Trehalose                              | Y | Y | Y | Y |
| 79  | 2-Methylaconitate          | -                                     | Chlorogenic acid                       | Y | Y | Y | Y |
| 80  | Targinine                  | -                                     | Luteone                                | Y | Y | Y | Y |
| 81  | Kynurenic acid             | -                                     | Isoferulic acid 3-O-glucuronide        | Y | Y | Y | Y |
| 82  | Diaminopimelic acid        | -                                     | Quercetin 3-arabinoside                | Y | Y | Y | Y |
| 83  | 5-Hydroxyindoleacetic acid | -                                     | Delphinidin 3-arabinoside              | Y | Y | Y | Y |
| 84  | Neocnidilide               | -                                     | Epigallocatechin 3-cinnamate           | Y | Y | Y | Y |
| 85  | Tyrosine methylester       | -                                     | Epicatechin-3-gallate                  | Y | Y | Y | Y |
| 86  | Dihydroferulic acid        | -                                     | Glucobrassicin                         | Y | Y | Y | Y |
| 87  | Dopa                       | -                                     | Trifolin                               | Y | Y | Y | Y |
| 88  | Capryloylglycine           | -                                     | Astilbin                               | Y | Y | Y | Y |
| 89  | Sebacic acid               | -                                     | Oleanolic acid                         | Y | Y | Y | Y |
| 90  | Daucic acid                | -                                     | Kaempferol 3-glucuronide               | Y | Y | Y | Y |
| 91  | Panthenol                  | -                                     | Quercetin 4'-glucoside                 | Y | Y | Y | Y |
| 92  | 2-Methylcitric acid        | -                                     | Glycyrrhetic acid                      | Y | Y | Y | Y |
| 93  | Jasmonic acid              | -                                     | Neoglucobrassicin                      | Y | Y | Y | Y |
| 94  | Dihydrojasmonic acid       | -                                     | Myricetin 3-galactoside                | Y | Y | Y | Y |
| 95  | Valylproline               | -                                     | Epigallocatechin 3'-glucuronide        | Y | Y | Y | Y |
| 96  | 3-Oxododecanoic acid       | -                                     | Asiatic acid                           | Y | Y | Y | Y |
| 97  | Tridecanoic acid           | -                                     | Medicagenic acid                       | Y | Y | Y | Y |
| 98  | N-Acetylserotonin          | -                                     | Protohypericin                         | Y | Y | Y | Y |
| 99  | Dihydrosinapic acid        | -                                     | Dicaffeoylquinic acid                  | Y | Y | Y | Y |
| 100 | Resveratrol                | -                                     | Isolariciresinol 4'-O-beta-D-glucoside | Y | Y | Y | Y |
| 101 | 2-Isopropyl citrate        | -                                     | Quercetin 3-(6''-malonyl-glucoside)    | Y | Y | Y | Y |
| 102 | Pirbuterol                 | -                                     | Isorhamnetin 3-(6''-malonylglucoside)  | Y | Y | Y | Y |
| 103 | Muramic acid               | -                                     | Procyanidin B1                         | Y | Y | Y | Y |
| 104 | Palmitic amide             | -                                     | Rutin                                  | Y | Y | Y | Y |
| 105 | Glycerophosphocholine      | -                                     | Isochesnatin                           | Y | Y | Y | Y |
| 106 | Coumapherine               | -                                     | Limocitrin 3-rutinoside                | Y | Y | Y | Y |
| 107 | Glucose 1-phosphate        | -                                     | Procyanidin C1                         | Y | Y | Y | Y |
| 108 | gamma-Glutamylleucine      | -                                     | -                                      | Y | Y | Y | Y |
| 109 | Epidermin                  | -                                     | -                                      | Y | Y | Y | Y |
| 110 | Adenosine                  | -                                     | -                                      | Y | Y | Y | Y |
| 111 | L-Agaritine                | -                                     | -                                      | Y | Y | Y | Y |
| 112 | Octadecylamine             | -                                     | -                                      | Y | Y | Y | Y |
| 113 | Fukiic acid                | -                                     | -                                      | Y | Y | Y | Y |
| 114 | Stearidonic acid           | -                                     | -                                      | Y | Y | Y | Y |
| 115 | Linoleamide                | -                                     | -                                      | Y | Y | Y | Y |
| 116 | Oleamide                   | -                                     | -                                      | Y | Y | Y | Y |
| 117 | Octadecanamide             | -                                     | -                                      | Y | Y | Y | Y |
| 118 | Kaempferol                 | -                                     | -                                      | Y | Y | Y | Y |

|     |                                   |   |   |   |   |   |   |
|-----|-----------------------------------|---|---|---|---|---|---|
| 119 | Argininosuccinic acid             | - | - | Y | Y | Y | Y |
| 120 | Dihydrotestosterone               | - | - | Y | Y | Y | Y |
| 121 | Pantoyllactone glucoside          | - | - | Y | Y | Y | Y |
| 122 | Palmitoleylethanolamide           | - | - | Y | Y | Y | Y |
| 123 | Sphingosine                       | - | - | Y | Y | Y | Y |
| 124 | Sphinganine                       | - | - | Y | Y | Y | Y |
| 125 | Eicosapentaenoic acid             | - | - | Y | Y | Y | Y |
| 126 | 2'-Deoxymugineic acid             | - | - | Y | Y | Y | Y |
| 127 | Eicosadienoic acid                | - | - | Y | Y | Y | Y |
| 128 | N-Acetylneuraminic acid           | - | - | Y | Y | Y | Y |
| 129 | Ethyl oleate                      | - | - | Y | Y | Y | Y |
| 130 | Caftaric acid                     | - | - | Y | Y | Y | Y |
| 131 | Isorhamnetin                      | - | - | Y | Y | Y | Y |
| 132 | Phytosphingosine                  | - | - | Y | Y | Y | Y |
| 133 | Linoleoyl ethanolamide            | - | - | Y | Y | Y | Y |
| 134 | N-Glycylneuraminic acid           | - | - | Y | Y | Y | Y |
| 135 | Oleylethanolamide                 | - | - | Y | Y | Y | Y |
| 136 | Dihydromelilotoside               | - | - | Y | Y | Y | Y |
| 137 | Dopamine glucuronide              | - | - | Y | Y | Y | Y |
| 138 | Glucogallin                       | - | - | Y | Y | Y | Y |
| 139 | Prostaglandin B1                  | - | - | Y | Y | Y | Y |
| 140 | Olopatadine                       | - | - | Y | Y | Y | Y |
| 141 | 3-O-p-Coumaroylquinic acid        | - | - | Y | Y | Y | Y |
| 142 | Erucic acid                       | - | - | Y | Y | Y | Y |
| 143 | Rutagravine                       | - | - | Y | Y | Y | Y |
| 144 | Lactosamine                       | - | - | Y | Y | Y | Y |
| 145 | Pelargonidin 3-rhamnoside         | - | - | Y | Y | Y | Y |
| 146 | Trehalose 6-phosphate             | - | - | Y | Y | Y | Y |
| 147 | Theaflavic acid                   | - | - | Y | Y | Y | Y |
| 148 | Folinic acid                      | - | - | Y | Y | Y | Y |
| 149 | Pubescenol                        | - | - | Y | Y | Y | Y |
| 150 | Proanthocyanidin A2               | - | - | Y | Y | Y | Y |
| 151 | 8,8'-Methylenebiscatechin         | - | - | Y | Y | Y | Y |
| 152 | 3-trans-p-Coumaroylrotundic acid- | - | - | Y | Y | Y | Y |

Y: Identified, FS: fruit-set stage, V: veraison stage, RIP-SF: ripening skin/flesh stage, and RIP-S: ripening seeds stage.
